# Supplementary material for: A Comparison of Three Artificial Rumen Systems for Rumen Microbiome Modeling
Source: MDPI journal article supplement (doi:10.3390/fermentation9110953), 2023-11-07

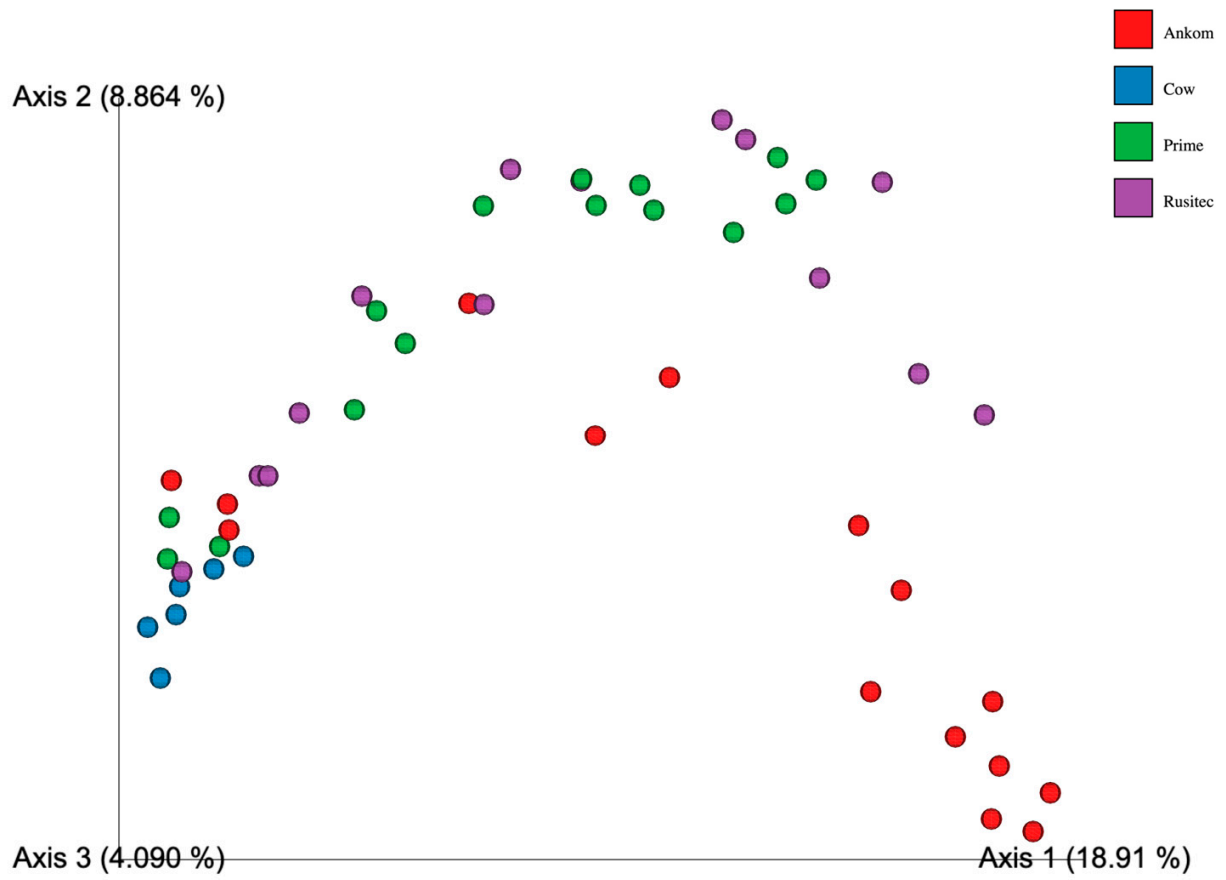

**Supplemental Figure S1:** Bray-Curtis Emperor plot with 16S reads. Plot generated using q2-diversity QIIME2 plugin and QIIME View for visualization.

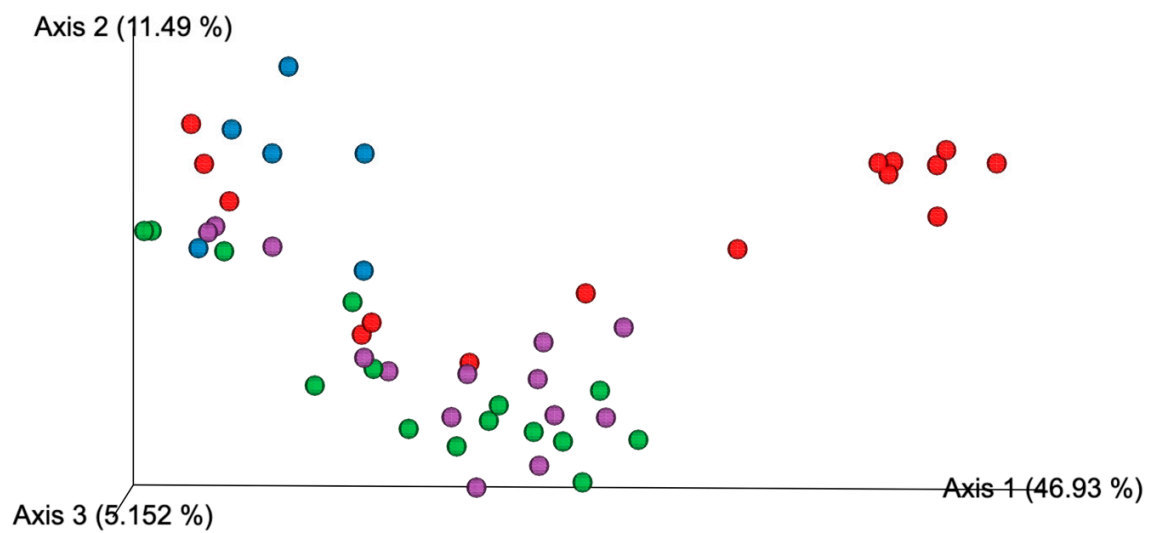

**Supplemental Figure S2:** Weighted Unifrac Emperor plot with 16S reads. Plot generated using q2-diversity QIIME2 plugin and QIIME View for visualization.

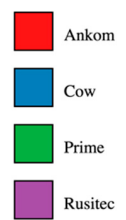

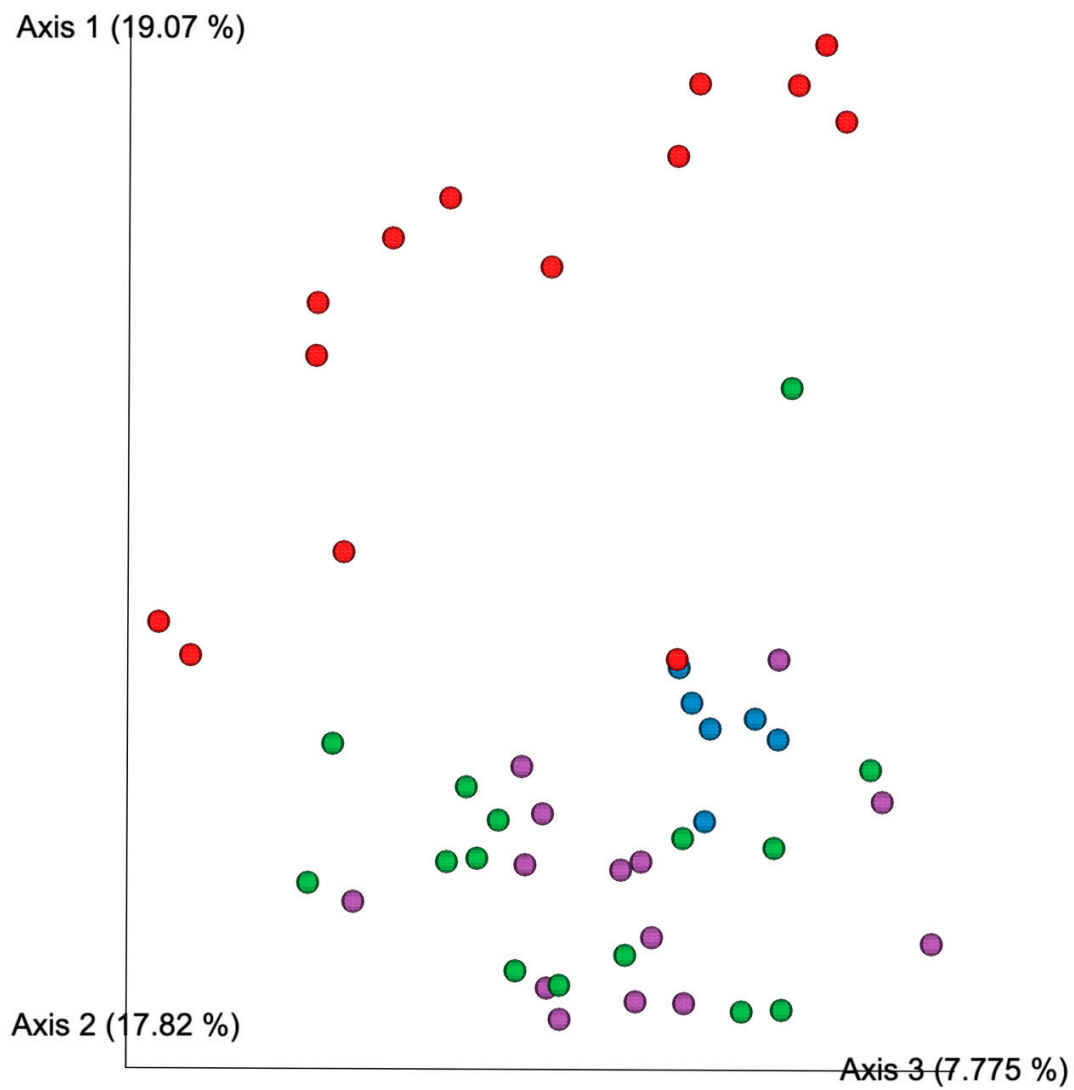

**Supplemental Figure S3:** Bray-Curtis Emperor plot with ITS reads. Plot generated using q2-diversity QIIME2 plugin and QIIME View for visualization.

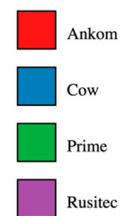

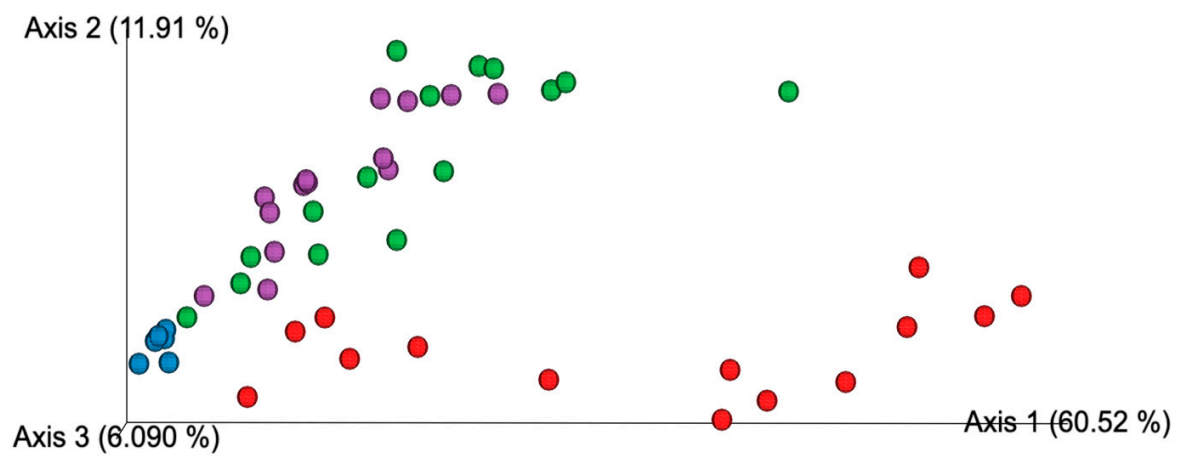

**Supplemental Figure S4:** Weighted Unifrac Emperor plot with ITS reads. Plot generated using q2-diversity QIIME2 plugin and QIIME View for visualization.

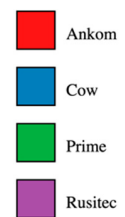

Supplement: s1 [file s1]
